# Supplementary material for: APPL1 regulates basal NF-κB activity by stabilizing NIK
Source: PubMed Central journal article supplement — J Cell Sci. 2012 Sep 1;125(17):4090–102. doi: 10.1242/jcs.105171 (PMC3482318; doi:10.1242/jcs.105171), 2012-09-01
Supplement: supp_125.17.4090_JCS105171.pdf [file supp_125.17.4090_JCS105171.pdf]

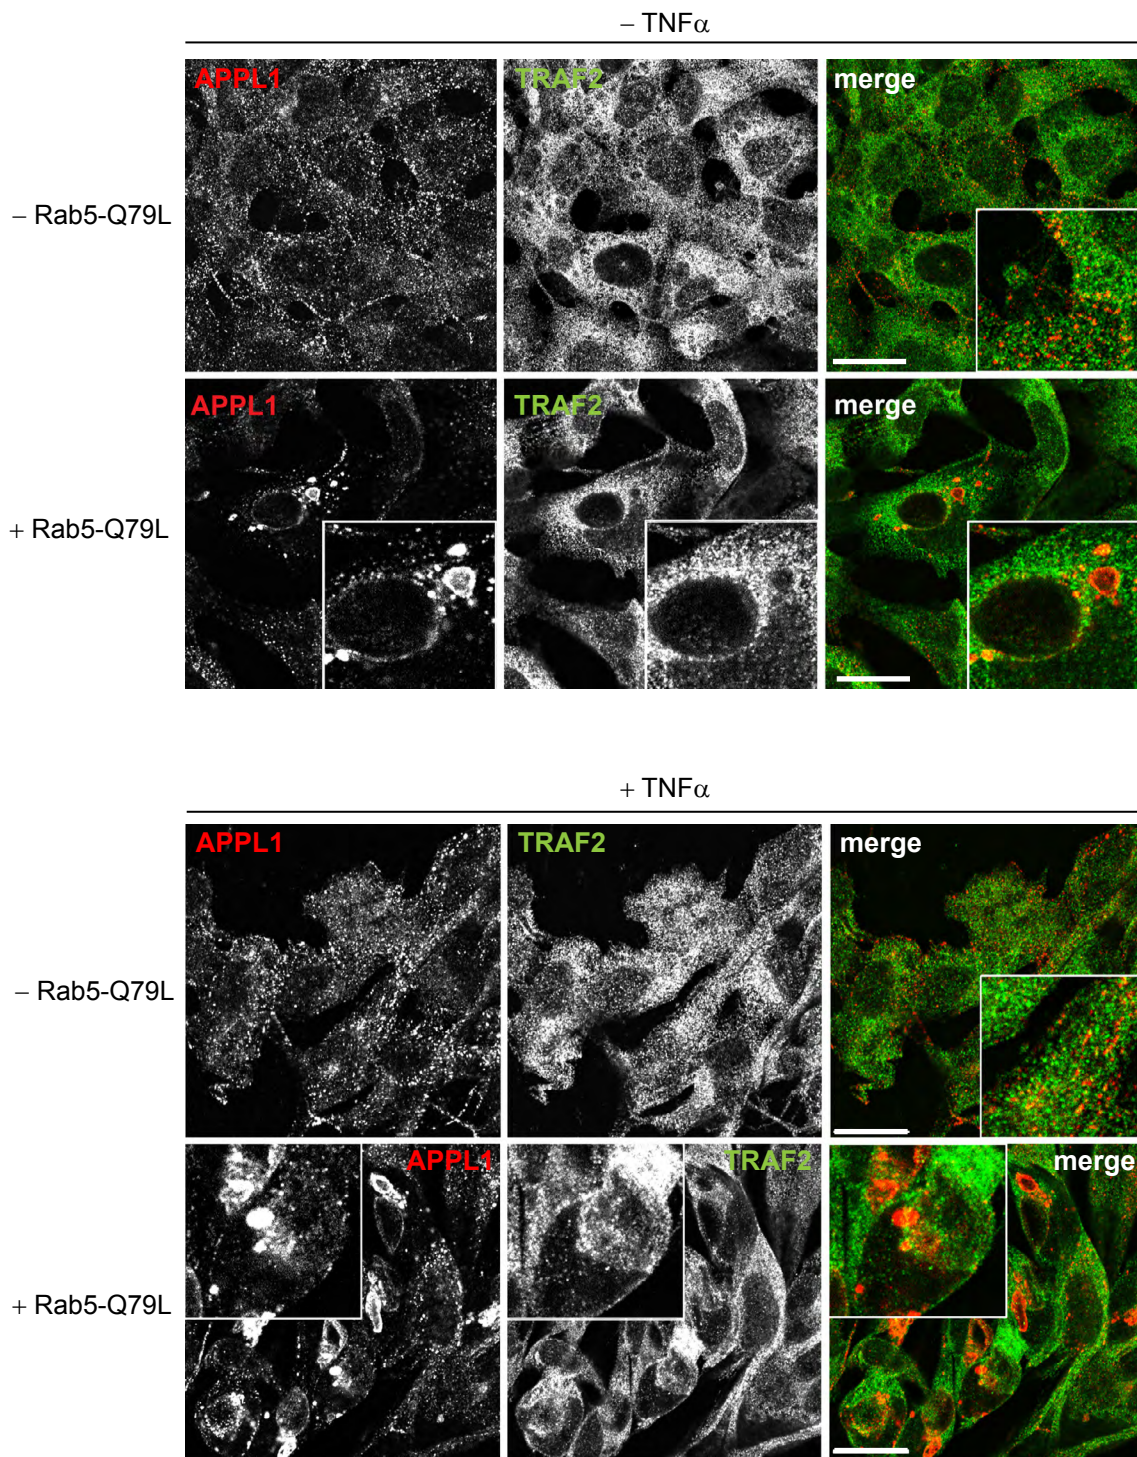

**Fig. S2 TRAF2 is not detectable on endosomes.** Twenty-four h after transfection with Rab5-Q79L, HEK293T cells were stimulated with TNF $\alpha$  for 10 min or left untreated, fixed and stained with antibodies against APPL1 (red) and TRAF2 (green). Scale bar, 20  $\mu$ m.

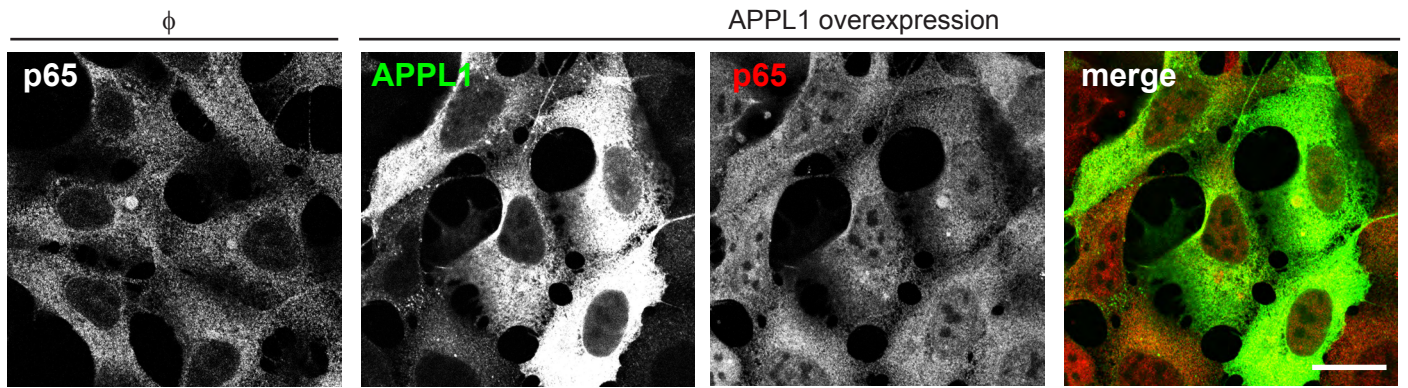

**Fig. S3 APPL1 overexpression enhances nuclear localization of p65 in HEK293T cells.** Twenty-four h after transfection with HA-APPL1, HEK293T cells were fixed and stained with anti-p65 (red) and anti-HA (APPL1, green) antibodies. Scale bar, 20  $\mu$ m.

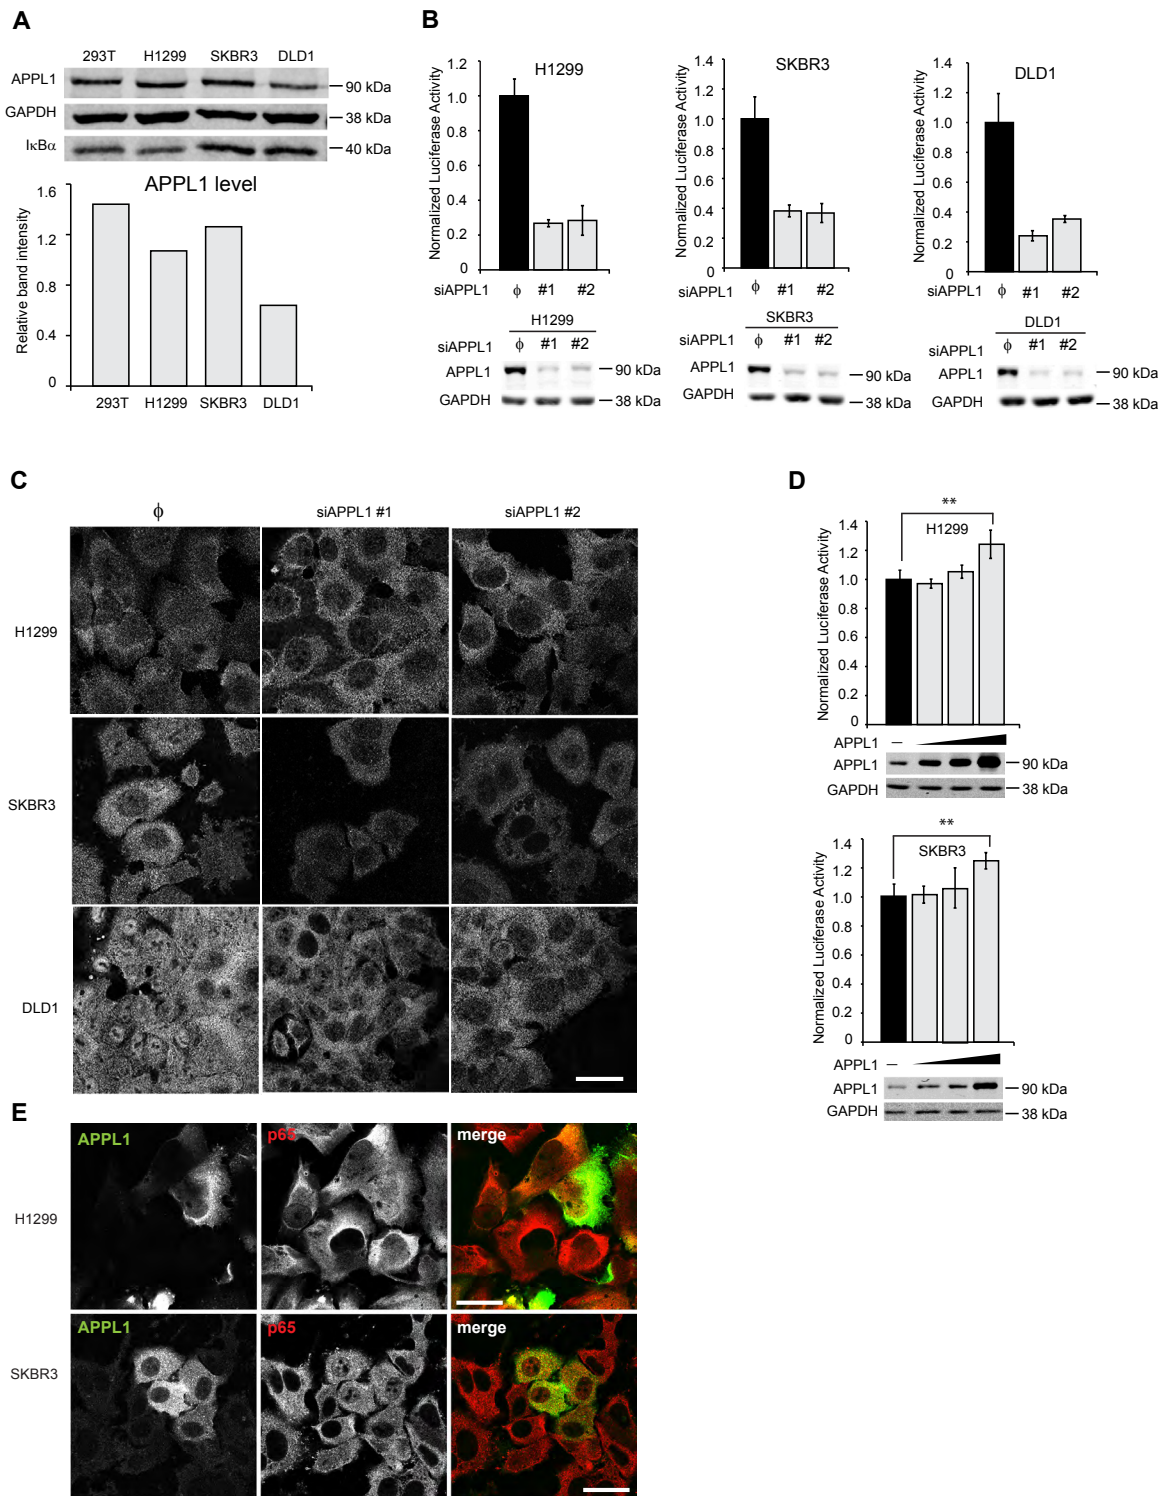

**Fig. S4 APPL1 modulates the NF- $\kappa$ B activity in cancer cells.** (A) Endogenous levels of APPL1 in cancer cells. The levels of APPL1, I $\kappa$ B $\alpha$  and GAPDH (loading control) in cell lysates from HEK293T, H1299, SKBR3 and DLD1 cells were analyzed by Western blotting. Band intensity of APPL1 was quantified compared to GAPDH (lower panel). A representative result from four independent experiments is shown. (B) APPL1 knockdown inhibits the NF- $\kappa$ B reporter in cancer cells. H1299, SKBR3 and DLD1 cells were cotransfected with reporter plasmids along with APPL1 siRNA #1 and #2 or non-targeting siRNA ( $\phi$ ). The luciferase activity was measured as described in Materials and Methods. Knockdown of APPL1 level was confirmed by immunoblotting (lower panels) with GAPDH level as a loading control. (C) APPL1 knockdown inhibits p65 translocation to the nucleus in cancer cells. H1299, SKBR3 and DLD1 cells transfected with non-targeting siRNA ( $\phi$ ) or APPL1 siRNAs (#1 or #2) were fixed after 48 h and stained with anti-p65 antibody (scale bar, 20  $\mu$ m). (D) High amounts of overexpressed APPL1 activate the NF- $\kappa$ B reporter in cancer cells. H1299 and SKBR3 cells were cotransfected for 48 h with reporter plasmids along with 0.25, 0.5 and 1  $\mu$ g of APPL1 expression vector and the luciferase activity was measured. The p-values were calculated upon comparison of overexpression of APPL1 to the overexpression of an empty vector and were marked with the asterisks (\*\* $p < 0.005$ ). (E) APPL1 overexpression enhances nuclear localization of p65 in cancer cells. Twenty-four h after transfection with HA-APPL1, H1299 and SKBR3 cells were fixed and stained with anti-p65 (red) and anti-HA (APPL1, green) antibodies. Scale bar, 20  $\mu$ m.

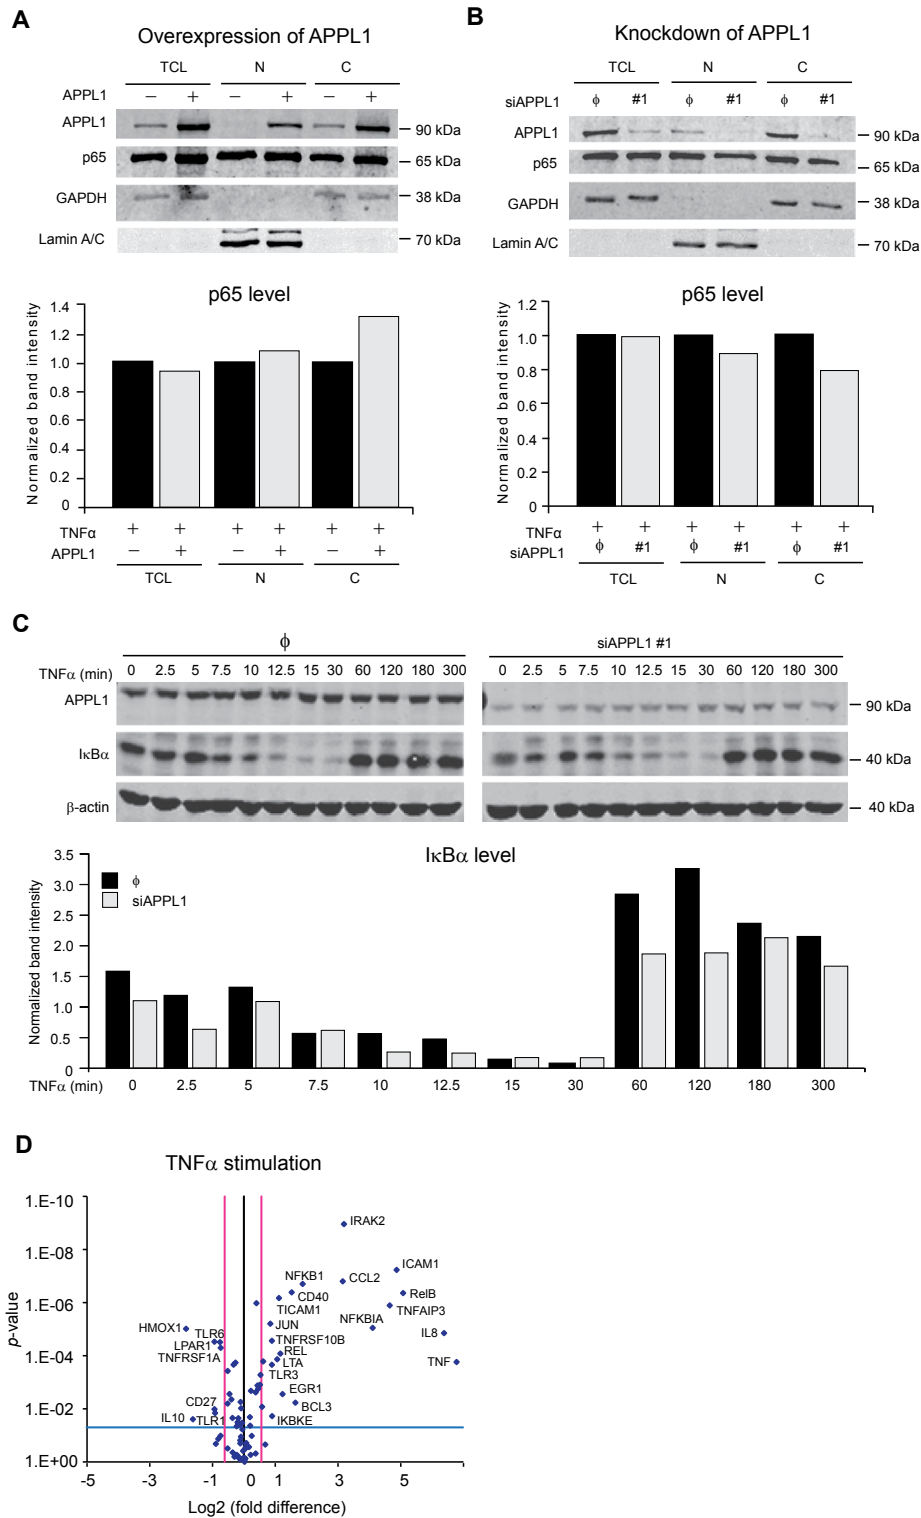

**Fig. S5 APPL1 is not necessary for TNF $\alpha$ -mediated NF- $\kappa$ B activation.** (A) APPL1 overexpression does not enhance nuclear localization of p65 upon TNF $\alpha$  stimulation. HEK293T cells were transfected with APPL1-expressing vector or an empty vector as a control. Forty-eight h after transfection cells were treated with TNF $\alpha$  for 30 min. Cell fractions were analyzed by Western blotting with anti-APPL1, p65, GAPDH and Lamin A/C antibodies (upper panel). Band intensity of p65 was quantified (lower panel). (B) APPL1 knockdown does not affect nuclear localization of p65 upon TNF $\alpha$  stimulation. HEK293T cells were transfected for 48 h with APPL1 siRNA #1 or non-targeting siRNA ( $\phi$ ) followed by treatment with TNF $\alpha$  for 30 min. Cell fractions were analyzed as in (A). (C) APPL1 knockdown does not affect I $\kappa$ B $\alpha$  degradation. HEK293T cells were transfected with APPL1 siRNA #1 or non-targeting siRNA ( $\phi$ ). Lysates from cells stimulated with TNF $\alpha$  for the indicated time points were analyzed for I $\kappa$ B $\alpha$ , APPL1 and  $\beta$ -actin levels (upper panel). Both control and APPL1-depleted samples were run on the same gel, which was cut for the transfer. The band intensity was determined and shown as ratio of I $\kappa$ B $\alpha$  to  $\beta$ -actin (lower panel). A-(C) Representative results from three independent experiments are shown. (D) Analysis of NF- $\kappa$ B-dependent gene expression upon TNF $\alpha$  stimulation in HEK293T cells. A predesigned 96-well array containing primer pairs for detection of 84 genes involved in NF- $\kappa$ B signaling was used. The vertical lines indicate the 1.5-fold change in gene expression threshold. The horizontal line indicates the p-value=0.05 of the t-test threshold. Only genes with fold changes <-1.5 or >1.5 were considered as significantly down- or upregulated and their names are mentioned on the charts.

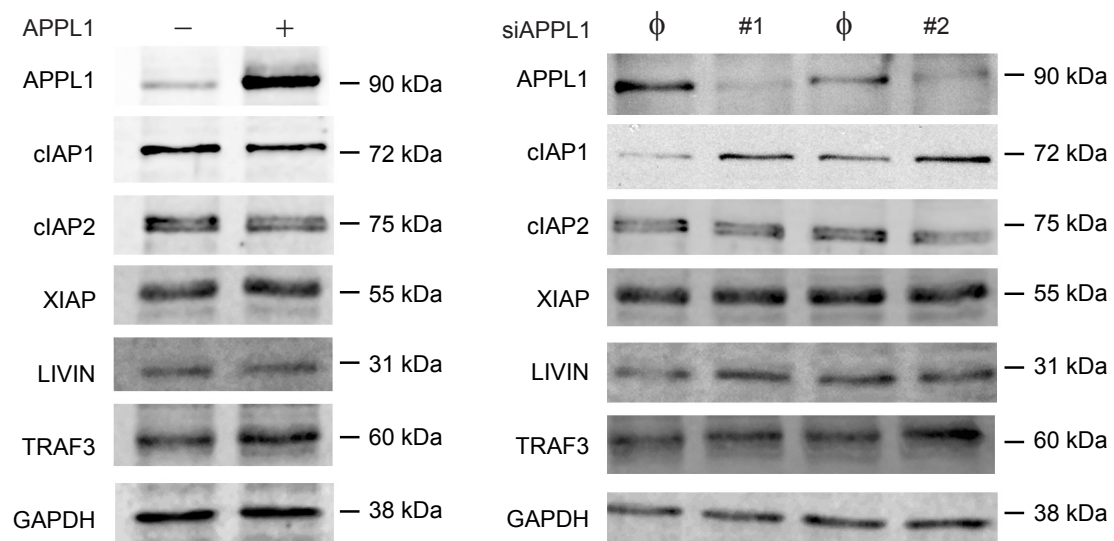

**Fig. S6 Effects of APPL1 on the total protein levels of IAP E3 ligases.** HEK293T cells were transfected with APPL1 expression vector (left panel) or with APPL1 siRNA #1 and #2 or non-targeting siRNA ( $\phi$ ) (right panel). Forty-eight h after transfection, the levels of APPL1, cIAP1, cIAP2, XIAP, livin, TRAF3 and GAPDH (loading control) were analyzed by Western blotting.
